# Supplementary material for: Pedodiversity and Organic Matter Stock of Soils Developed on Sandstone Formations in the Northern Apennines (Italy)
Source: MDPI journal article supplement (doi:10.3390/land12010079), 2022-12-27
Supplement: s1 [file s1]

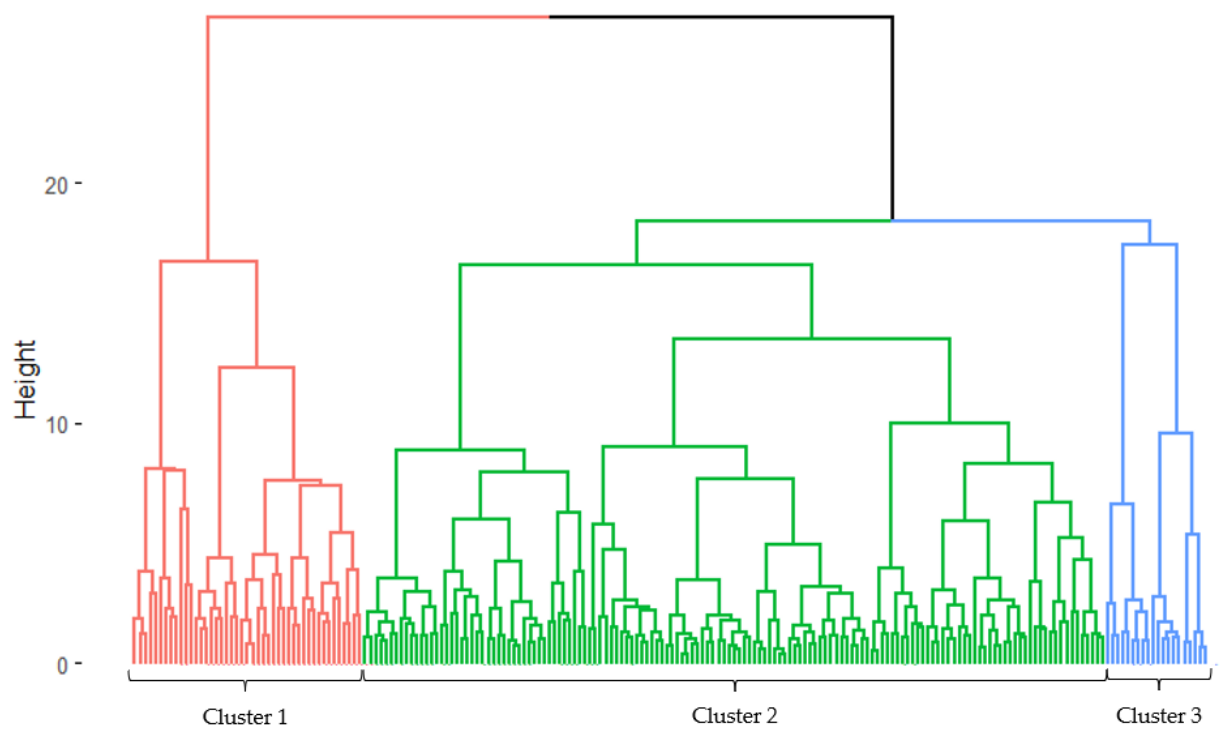

**Figure S1.** Dendrogram obtained via hierarchical cluster analysis performed on soil samples from 400–1000 m above sea level.

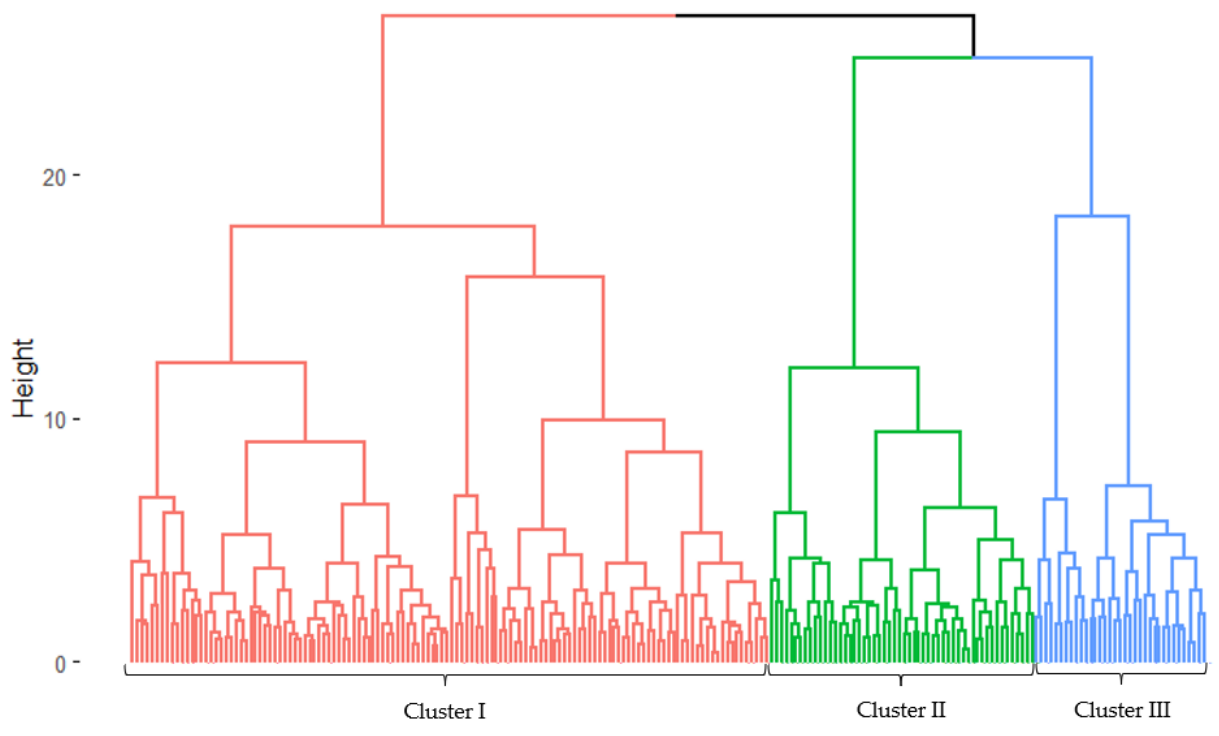

**Figure S2.** Dendrogram obtained via hierarchical cluster analysis performed on soil samples at 1000–2134 m above sea level.

**Table S1.** Soil type, coordinates, aspect, slope gradient, vegetation type, and altitude of plots under investigation.

| Plot | Soil type               | Coordinates         |         | Aspect | Slope | Vegetation | Altitude |
|------|-------------------------|---------------------|---------|--------|-------|------------|----------|
|      |                         | (WGS84/UTM zone 32) |         |        |       |            |          |
|      |                         | m E                 | m N     |        |       |            |          |
| A1   | HUMIC LITHIC DYSTRUDEPT | 627195              | 4886539 | N      | 30_50 | BLB        | 1770     |
| A2   | HUMIC LITHIC DYSTRUDEPT | 626244              | 4888557 | E      | >50   | BLB        | 1760     |
| A3   | HUMIC DYSTRUDEPT        | 627225              | 4886628 | N      | 10_30 | BLB        | 1750     |
| A4   | HUMIC DYSTRUDEPT        | 626300              | 4888621 | E      | >50   | BEF        | 1720     |
| A40  | TYPIC DYSTRUDEPTS       | 627259              | 4887352 | N      | 0_10  | BEF        | 1602     |
| A41  | TYPIC DYSTRUDEPTS       | 627165              | 4887374 | W      | 10_30 | BEF        | 1598     |
| A45  | TYPIC DYSTRUDEPTS       | 627358              | 4887628 | N      | 0_10  | BEF        | 1601     |
| A46  | TYPIC DYSTRUDEPTS       | 627298              | 4887626 | W      | 10_30 | BEF        | 1593     |
| A47  | TYPIC DYSTRUDEPTS       | 627061              | 4887197 | N      | 10_30 | BLB        | 1596     |
| A48  | TYPIC DYSTRUDEPTS       | 627045              | 4887229 | N      | 10_30 | BLB        | 1579     |
| A5   | HUMIC DYSTRUDEPT        | 626245              | 4888735 | N      | 30_50 | BLB        | 1685     |
| B20  | TYPIC DYSTRUDEPTS       | 668692              | 4887022 | N      | 10_30 | MF         | 958      |
| B21  | TYPIC DYSTRUDEPTS       | 668011              | 4887414 | S      | 10_30 | MF         | 932      |
| C1   | TYPIC UDORTHENT         | 636811              | 4895267 | E      | 10_30 | GS         | 1710     |
| C10  | LITHIC UDORTHENT        | 637590              | 4896438 | S      | 10_30 | CON        | 1704     |
| C11  | LITHIC UDORTHENT        | 637383              | 4895256 | S      | 10_30 | BEF        | 1689     |
| C12  | LITHIC UDORTHENT        | 637191              | 4896547 | E      | 10_30 | CON        | 1654     |
| C13  | LITHIC HAPLOHUMODS      | 637124              | 4896456 | N      | 10_30 | BEF        | 1742     |
| C14  | LITHIC UDORTHENT        | 637093              | 4896241 | S      | 0_10  | BEF        | 1709     |
| C15  | LITHIC UDORTHENT        | 637285              | 4895977 | W      | 10_30 | BEF        | 1695     |
| C16  | LITHIC UDORTHENT        | 636086              | 4896647 | N      | 10_30 | CON        | 1626     |
| C17  | LITHIC UDORTHENT        | 636370              | 4896769 | W      | 10_30 | BEF        | 1610     |
| C18  | LITHIC CRYORTHENT       | 635945              | 4894668 | N      | 0_10  | GS         | 2134     |
| C19  | LITHIC CRYORTHENT       | 635936              | 4894836 | N      | 30_50 | GS         | 2119     |
| C2   | TYPIC UDORTHENT         | 637080              | 4895192 | N      | 10_30 | CON        | 1697     |
| C20  | LITHIC DYSTRUDEPT       | 636625              | 4895567 | E      | 10_30 | GS         | 1869     |
| C21  | HUMIC LITHIC DYSTRUDEPT | 636508              | 4895415 | E      | 10_30 | BLB        | 1859     |
| C22  | HUMUS LITHIC EUTRUDEPTS | 637193              | 4896902 | N      | 10_30 | BEF        | 1595     |
| C23  | LITHIC UDORTHENT        | 637269              | 4896840 | N      | 10_30 | CON        | 1609     |
| C24  | TYPIC UDORTHENT         | 635890.9            | 4895224 | W      | 10_30 | BLB        | 1901     |
| C25  | LITHIC HAPLUDOLL        | 636683.6            | 4895828 | N      | 0_10  | GS         | 1752     |
| C27  | LITHIC EUTRUDEPT        | 637234.1            | 4896925 | N      | 10_30 | CON        | 1609     |
| C28  | TYPIC UDORTHENT         | 637165              | 4896781 | N      | 10_30 | CON        | 1553     |
| C3   | TYPIC UDORTHENT         | 637557              | 4896855 | E      | 10_30 | BEF        | 1700     |
| C31  | TYPIC UDORTHENT         | 636641.4            | 4895889 | S      | 0_10  | BLB        | 1766     |
| C4   | LITHIC CRYORTHENT       | 635826              | 4895003 | W      | 30_50 | GS         | 2027     |
| C5   | LITHIC DYSTRUDEPT       | 635892              | 4895230 | W      | 30_50 | BLB        | 1939     |
| C6   | LITHIC DYSTRUDEPT       | 635763              | 4895302 | W      | 10_30 | BLB        | 1901     |
| C7   | TYPIC UDORTHENT         | 637031              | 4895722 | E      | 30_50 | GS         | 1771     |
| C8   | HUMIC LITHIC DYSTRUDEPT | 636391              | 4895641 | N      | 10_30 | BLB        | 1846     |
| C9   | HUMIC LITHIC DYSTRUDEPT | 636549              | 4895939 | E      | 10_30 | BLB        | 1802     |
| D60  | TYPIC DYSTRUDEPTS       | 618341              | 4898077 | N      | 0_10  | BEF        | 1534     |
| D61  | TYPIC DYSTRUDEPTS       | 618311              | 4898094 | N      | >50   | BEF        | 1497     |
| D62  | TYPIC DYSTRUDEPTS       | 618558              | 4898111 | N      | 0_10  | BEF        | 1473     |
| D63  | TYPIC DYSTRUDEPTS       | 618491              | 4898090 | N      | 0_10  | BEF        | 1488     |

|     |                     |        |          |   |       |     |      |
|-----|---------------------|--------|----------|---|-------|-----|------|
| E50 | TYPIC DYSTRUDEPTS   | 641818 | 4889485  | N | 10_30 | BEF | 1532 |
| E51 | TYPIC DYSTRUDEPTS   | 641876 | 4889540  | N | 10_30 | BEF | 1507 |
| E52 | TYPIC DYSTRUDEPTS   | 641912 | 4889384  | E | 10_30 | CON | 1547 |
| E53 | TYPIC DYSTRUDEPTS   | 641930 | 48893350 | E | 10_30 | CON | 1521 |
| E54 | TYPIC DYSTRUDEPTS   | 642127 | 4889180  | N | 10_30 | BEF | 1501 |
| E55 | TYPIC DYSTRUDEPTS   | 642158 | 4889219  | N | 10_30 | CON | 1494 |
| F1  | TYPIC EUTRUDEPT     | 689825 | 4910378  | S | 10_30 | MF  | 500  |
| F2  | OXYAQUIC DYSTRUDEPT | 689329 | 4910183  | E | 10_30 | CHE | 586  |
| F4  | LITHIC EUTRUDEPT    | 683221 | 4918269  | S | 10_30 | MF  | 407  |
| G1  | TYPIC DYSTRUDEPT    | 656622 | 4889282  | N | 10_30 | CHE | 560  |
| G10 | TYPIC DYSTRUDEPT    | 656543 | 4889321  | N | 10_30 | CHE | 590  |
| G11 | TYPIC DYSTRUDEPT    | 656534 | 4889320  | N | 10_30 | CHE | 589  |
| G12 | TYPIC DYSTRUDEPT    | 656525 | 4889319  | N | 10_30 | CHE | 587  |
| G13 | TYPIC DYSTRUDEPT    | 656515 | 4889317  | W | 10_30 | CHE | 586  |
| G14 | TYPIC DYSTRUDEPT    | 656505 | 4889316  | W | 10_30 | CHE | 584  |
| G15 | TYPIC DYSTRUDEPT    | 656495 | 4889313  | W | 10_30 | CHE | 580  |
| G16 | TYPIC DYSTRUDEPT    | 656531 | 4889309  | N | 10_30 | CHE | 597  |
| G17 | TYPIC DYSTRUDEPT    | 656526 | 4889305  | N | 10_30 | CHE | 604  |
| G18 | TYPIC DYSTRUDEPT    | 656514 | 4889300  | N | 0_10  | CHE | 600  |
| G19 | TYPIC DYSTRUDEPT    | 656623 | 4889270  | W | 10_30 | CHE | 605  |
| G2  | TYPIC DYSTRUDEPT    | 656653 | 4889226  | N | 10_30 | CHE | 600  |
| G20 | TYPIC DYSTRUDEPT    | 656643 | 4889256  | W | 10_30 | CHE | 610  |
| G21 | TYPIC DYSTRUDEPT    | 656638 | 4889275  | N | 10_30 | CHE | 618  |
| G22 | TYPIC DYSTRUDEPT    | 656680 | 4889190  | N | 10_30 | MF  | 620  |
| G23 | TYPIC DYSTRUDEPT    | 656683 | 4889178  | N | 10_30 | MF  | 625  |
| G24 | TYPIC DYSTRUDEPT    | 656681 | 4889198  | N | 10_30 | MF  | 616  |
| G25 | TYPIC DYSTRUDEPT    | 656560 | 4889180  | N | 10_30 | CHE | 590  |
| G26 | TYPIC DYSTRUDEPT    | 656570 | 4889189  | N | 0_10  | CHE | 587  |
| G27 | TYPIC DYSTRUDEPT    | 656594 | 4889203  | N | 10_30 | CHE | 585  |
| G3  | LITHIC DYSTRUDEPT   | 656617 | 4889278  | W | 0_10  | CHE | 660  |
| G5  | TYPIC DYSTRUDEPT    | 656549 | 4889348  | W | 30_50 | CHE | 587  |
| L1  | TYPIC DYSTRUDEPT    | 687768 | 4904803  | N | 0_10  | CHE | 654  |
| L10 | TYPIC DYSTRUDEPT    | 686249 | 4904766  | E | 30_50 | CHE | 631  |
| L11 | LITHIC DYSTRUDEPT   | 686780 | 4904186  | N | 10_30 | CHE | 610  |
| L12 | LITHIC DYSTRUDEPT   | 686770 | 4904202  | N | 10_30 | CHE | 606  |
| L13 | LITHIC DYSTRUDEPT   | 686771 | 4904251  | N | 30_50 | CHE | 621  |
| L14 | LITHIC DYSTRUDEPT   | 686736 | 4904188  | N | 10_30 | CHE | 608  |
| L3  | TYPIC DYSTRUDEPT    | 685550 | 4904799  | S | 30_50 | MF  | 692  |
| L4  | TYPIC DYSTRUDEPT    | 679749 | 4905996  | W | 10_30 | CHE | 550  |
| L9  | TYPIC DYSTRUDEPT    | 686233 | 4904761  | E | 30_50 | CHE | 637  |
| M12 | LITHIC EUTRUDEPT    | 686059 | 4901709  | E | >50   | MF  | 774  |
| M13 | LITHIC DYSTRUDEPT   | 686877 | 4900905  | S | 30_50 | MF  | 890  |
| M14 | LITHIC UDORTHENT    | 686059 | 4898374  | N | 30_50 | CHE | 825  |
| M15 | LITHIC EUTRUDEPT    | 685826 | 4898658  | E | >50   | MF  | 815  |
| M16 | LITHIC UDORTHENT    | 683735 | 4898335  | S | 30_50 | MF  | 782  |
| M17 | OXYAQUIC DYSTRUDEPT | 685598 | 4899918  | W | 10_30 | CHE | 812  |
| M18 | OXYAQUIC DYSTRUDEPT | 683838 | 4896206  | N | 10_30 | CHE | 878  |
| M19 | TYPIC EUTRUDEPT     | 682495 | 4900338  | S | 30_50 | MF  | 678  |
| M20 | OXYAQUIC DYSTRUDEPT | 683482 | 4901123  | E | 10_30 | MF  | 733  |

|     |                            |        |         |   |       |     |      |
|-----|----------------------------|--------|---------|---|-------|-----|------|
| M21 | TYPIC DYSTRUDEPTS          | 685387 | 4894525 | N | 10_30 | BEF | 1228 |
| M22 | LITHIC EUTRUDEPT           | 686943 | 4901411 | E | >50   | MF  | 845  |
| M3  | TYPIC DYSTRUDEPT           | 690027 | 4898707 | S | 30_50 | CHE | 721  |
| M30 | LITHIC UDORTHENT           | 685236 | 4893378 | E | 10_30 | BEF | 1155 |
| M31 | LITHIC EUTRUDEPT           | 685511 | 4894770 | S | 10_30 | CON | 1196 |
| M33 | LITHIC EUTRUDEPT           | 684784 | 4893691 | W | 10_30 | CON | 1250 |
| M34 | LITHIC UDORTHENT           | 684960 | 4893501 | E | 10_30 | BEF | 1305 |
| M35 | LITHIC UDORTHENT           | 687733 | 4901915 | S | 10_30 | MF  | 715  |
| M4  | TYPIC DYSTRUDEPT           | 690016 | 4898702 | S | 30_50 | CHE | 716  |
| M43 | LITHIC UDORTHENT           | 683455 | 4894598 | W | 10_30 | CHE | 919  |
| M45 | HUMUS LITHIC EUTRUDEPTS    | 683498 | 4894574 | N | 10_30 | CON | 935  |
| M5  | TYPIC DYSTRUDEPT           | 690015 | 4898699 | S | 30_50 | CHE | 716  |
| M6  | LITHIC DYSTRUDEPT          | 689880 | 4898803 | N | 10_30 | CHE | 697  |
| M7  | LITHIC DYSTRUDEPT          | 689775 | 4898809 | N | 30_50 | CHE | 687  |
| M8  | LITHIC DYSTRUDEPT          | 689778 | 4898812 | N | 30_50 | CHE | 688  |
| P10 | HUMIC LITHIC DYSTRUDEPT    | 603618 | 4905142 | E | >50   | BEF | 1641 |
| P11 | TYPIC DYSTRUDEPTS          | 610279 | 4904365 | S | 30_50 | BEF | 1500 |
| P3  | TYPIC HAPLORTHOD           | 610899 | 4901939 | N | 10_30 | BLB | 1750 |
| P4  | TYPIC HAPLORTHOD           | 610157 | 4902367 | N | 30_50 | BLB | 1730 |
| P6  | HUMIC LITHIC DYSTRUDEPT    | 610157 | 4902367 | N | 30_50 | BEF | 1700 |
| P8  | HUMIC DYSTRUDEPT           | 603598 | 4905172 | E | 30_50 | BLB | 1652 |
| R10 | (SPODIC) LITHIC DYSTRUDEPT | 645670 | 4888404 | N | 30_50 | BEF | 1424 |
| R11 | TYPIC DYSTRUDEPTS          | 646303 | 4887097 | N | 0_10  | BLB | 1877 |
| R12 | LITHIC DYSTRUDEPT          | 646082 | 4887343 | N | 10_30 | BLB | 1788 |
| R2  | LITHIC HAPLUDOLL           | 646634 | 4888022 | W | 10_30 | GS  | 1729 |
| R3  | HUMIC LITHIC DYSTRUDEPT    | 646498 | 4888068 | W | 10_30 | CON | 1681 |
| R4  | (SPODIC) LITHIC DYSTRUDEPT | 646356 | 4887858 | W | >50   | BEF | 1607 |
| R5  | LITHIC HAPLOHUMODS         | 645373 | 4887519 | W | >50   | BEF | 1596 |
| R6  | LITHIC DYSTRUDEPT          | 645388 | 4889537 | W | 30_50 | CON | 1231 |
| R7  | HUMIC LITHIC DYSTRUDEPT    | 645484 | 4889538 | N | 10_30 | BEF | 1254 |
| R8  | HUMUS LITHIC EUTRUDEPTS    | 653544 | 4889473 | N | 10_30 | CON | 1038 |
| R9  | HUMUS LITHIC EUTRUDEPTS    | 653384 | 4889232 | W | 30_50 | BEF | 970  |
| T11 | LITHIC EUTRUDEPT           | 671309 | 4903609 | W | 30_50 | MF  | 506  |
| T4  | LITHIC UDORTHENT           | 672063 | 4902913 | S | 30_50 | MF  | 595  |
| T5  | TYPIC UDORTHENT            | 672073 | 4903654 | N | 10_30 | MF  | 625  |
| U25 | TYPIC UDORTHENT            | 659049 | 4916723 | S | 0_10  | CHE | 640  |
| U26 | TYPIC UDORTHENT            | 659072 | 4916758 | N | 0_10  | CHE | 647  |
| U27 | TYPIC UDORTHENT            | 659089 | 4916773 | N | 30_50 | CHE | 643  |
| U28 | TYPIC UDORTHENT            | 658831 | 4916463 | N | 30_50 | CHE | 608  |
| U29 | TYPIC UDORTHENT            | 658828 | 4916468 | W | >50   | CHE | 631  |
| U30 | TYPIC UDORTHENT            | 658899 | 4916518 | N | 10_30 | CHE | 598  |
| U31 | TYPIC UDORTHENT            | 658815 | 4916497 | N | 30_50 | CHE | 615  |
| V1  | TYPIC DYSTRUDEPT           | 617920 | 4926380 | W | 30_50 | CHE | 744  |
| V19 | TYPIC DYSTRUDEPT           | 618243 | 4926952 | N | 10_30 | CHE | 793  |
| V2  | TYPIC DYSTRUDEPT           | 617920 | 4926380 | W | 10_30 | CHE | 734  |
| V20 | TYPIC DYSTRUDEPT           | 618265 | 4926959 | E | 10_30 | CHE | 745  |
| V21 | TYPIC DYSTRUDEPT           | 618330 | 4926980 | E | 30_50 | CHE | 700  |
| V22 | TYPIC DYSTRUDEPT           | 618338 | 4927058 | E | 30_50 | CHE | 685  |
| V23 | TYPIC DYSTRUDEPT           | 618335 | 4927073 | E | 30_50 | CHE | 686  |

CON = coniferous forest, BEF = beech forest, BLB = blueberry habitats, CHE = chestnut stands, MF = mixed forest, GS = grassland.

**Table S2.** Monthly and yearly mean air temperatures and cumulative precipitation.

| Climatic station   | Altitude m a.s.l. | Coordinates      |         | Jan | Feb | Mar  | Apr | May  | Jun | Jul | Aug  | Sep | Oct | Nov | Dec  | Year |  |
|--------------------|-------------------|------------------|---------|-----|-----|------|-----|------|-----|-----|------|-----|-----|-----|------|------|--|
| Monte Cimone       | 2173              | Lat              | T       | -   | -   | -1.4 | 0.1 | 5    | 9.2 | 11. | 12.1 | 7.3 | 4.6 | 0.1 | -2.7 | 3.3  |  |
|                    |                   | 44°20'N          | °C      | 3.2 | 3.3 |      |     |      |     | 8   |      |     |     |     |      |      |  |
|                    |                   | Long<br>10°70'E  | P<br>mm | 72  | 56  | 166  | 152 | 126  | 64  | 23  | 16   | 36  | 73  | 104 | 76   | 964  |  |
| Passo delle Radici | 1535              | Lat              | T       | 0.2 | 0.6 | 2.9  | 6.4 | 10.3 | 14. | 16. | 16.5 | 12. | 8.6 | 4.3 | 1.3  | 7.8  |  |
|                    |                   | 44°21'N          | °C      |     |     |      |     |      | 2   | 5   |      | 3   |     |     |      |      |  |
|                    |                   | Long<br>10°49'E  | P<br>mm | 108 | 131 | 129  | 160 | 119  | 101 | 55  | 69   | 133 | 216 | 266 | 216  | 1703 |  |
| Pian di Balestra   | 1040              | Lat              | T       | 0.4 | 1.8 | 4.8  | 8.8 | 12.8 | 17. | 19. | 19.5 | 15. | 10. | 5.7 | 1.9  | 9.9  |  |
|                    |                   | 44°21'N          | °C      |     |     |      |     |      | 2   | 9   |      | 1   | 7   |     |      |      |  |
|                    |                   | Long<br>11°14' E | P<br>mm | 128 | 138 | 125  | 128 | 110  | 90  | 43  | 58   | 106 | 162 | 200 | 158  | 1446 |  |
| Passo del Giogo    | 887               | Lat              | T       | 0.7 | 1.5 | 3.8  | 7.3 | 11.8 | 15. | 18. | 18.3 | 14. | 10. | 5.4 | 2.1  | 9.2  |  |
|                    |                   | 44°06'N          | °C      |     |     |      |     |      | 5   | 5   |      | 9   | 1   |     |      |      |  |
|                    |                   | Long<br>11°24'E  | P<br>mm | 55  | 83  | 88   | 99  | 82   | 68  | 44  | 59   | 97  | 114 | 145 | 119  | 1083 |  |
| Monghidoro         | 841               | Lat              | T       | 0.8 | 2.2 | 5.2  | 9.2 | 13.2 | 17. | 20. | 20   | 16. | 11. | 6.1 | 2.3  | 10.4 |  |
|                    |                   | 44°13'N          | °C      |     |     |      |     |      | 6   | 3   |      | 4   | 1   |     |      |      |  |
|                    |                   | Long<br>11°19'E  | P<br>mm | 96  | 95  | 95   | 99  | 95   | 80  | 37  | 58   | 86  | 118 | 136 | 118  | 1113 |  |
| Pievepelago        | 761               | Lat              | T       | 0.3 | 0.5 | 3.8  | 7.6 | 11.7 | 16. | 18. | 18.3 | 13. | 10. | 5.2 | 1.5  | 8.9  |  |
|                    |                   | 44°12'N          | °C      |     |     |      |     |      | 2   | 3   |      | 9   | 2   |     |      |      |  |
|                    |                   | Long<br>10°37'E  | P<br>mm | 92  | 95  | 103  | 142 | 137  | 109 | 85  | 77   | 128 | 163 | 169 | 115  | 1415 |  |
| Farneta            | 703               | Lat              | T       | 1.3 | 2   | 5.3  | 9   | 13.3 | 17. | 19. | 18.9 | 14. | 10. | 5.5 | 2    | 9.9  |  |
|                    |                   | 44°35'N          | °C      |     |     |      |     |      | 3   | 6   |      | 2   | 2   |     |      |      |  |
|                    |                   | Long<br>10°57'E  | P<br>mm | 52  | 62  | 76   | 99  | 88   | 77  | 52  | 61   | 91  | 106 | 126 | 102  | 991  |  |
| Monzuno            | 589               | Lat 44°28' N     | T       | 3.8 | 4.7 | 8.4  | 11. | 16.4 | 20. | 23. | 23.4 | 18. | 13. | 8.3 | 4.6  | 13.1 |  |
|                    |                   |                  | °C      |     |     |      | 8   |      | 6   | 2   |      | 2   | 4   |     |      |      |  |
|                    |                   | Long<br>11°27'N  | P<br>mm | 52  | 59  | 7.1  | 95  | 89   | 77  | 51  | 61   | 92  | 115 | 136 | 91   | 988  |  |
| Porretta           | 352               | Lat              | T       | 3.1 | 4.2 | 7.9  | 11. | 15.2 | 19. | 22. | 22.7 | 17, | 13, | 7,7 | 4,1  | 12.4 |  |
|                    |                   | 44°09'N          | °C      |     |     |      | 3   |      | 9   | 8   |      | 3   | 1   |     |      |      |  |
|                    |                   | Long<br>10°58' E | P<br>mm | 80  | 93  | 94   | 91  | 83   | 70  | 46  | 54   | 77  | 111 | 128 | 105  | 1032 |  |
| Sasso Marconi      | 275               | Lat 44°44' N     | T       | 4.4 | 6.1 | 9.9  | 13. | 18.4 | 22. | 25. | 25.2 | 20. | 15. | 9.3 | 5    | 14.6 |  |
|                    |                   |                  | °C      |     |     |      | 7   |      | 6   | 3   |      | 1   | 1   |     |      |      |  |
|                    |                   | Long<br>11°24' E | P<br>mm | 40  | 60  | 61   | 75  | 70   | 65  | 36  | 46   | 72  | 81  | 90  | 58   | 753  |  |
